# Supplementary material for: Racial and Ethnic Bias in Risk Prediction Models for Colorectal Cancer Recurrence When Race and Ethnicity Are Omitted as Predictors
Source: PubMed Central journal article supplement (PMC10273018; doi:10.1001/jamanetworkopen.2023.18495), 2023-06-15
Supplement: jamanetwopen-e2318495-s002.pdf [file jamanetwopen-e2318495-s002.pdf]

## Data Sharing Statement

Khor. Racial and Ethnic Bias in Risk Prediction Models for Colorectal Cancer Recurrence When Race and Ethnicity Are Omitted as Predictors. *JAMA Netw Open*. Published June 15, 2023. doi:10.1001/jamanetworkopen.2023.18495

### Data

**Data available:** No

### Additional Information

**Explanation for why data not available:** The deidentified dataset used in this study can be made available on a reasonable request basis with institutional approvals.
